# Supplementary material for: Anti-aging protein α-Klotho is potential for reducing comorbidity risk of cardiometabolic diseases in vulnerable populations and enhancing long-term prognosis
Source: Springer Nature journal article supplement (doi:10.1038/s41598-025-01580-4), 2025-05-14
Supplement: MOESM1 [file 41598_2025_1580_MOESM1_ESM.pdf]

## Supplementary materials

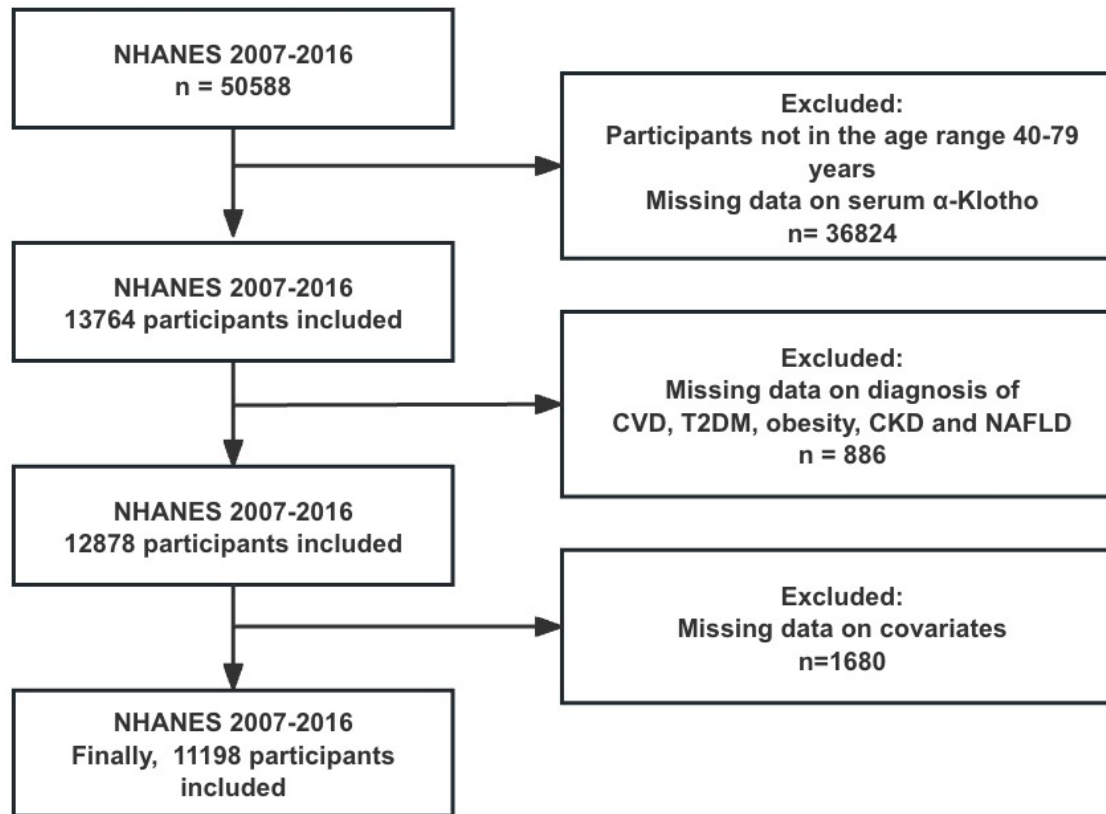

Supplementary Figure 1. Flow chart of the participant selection

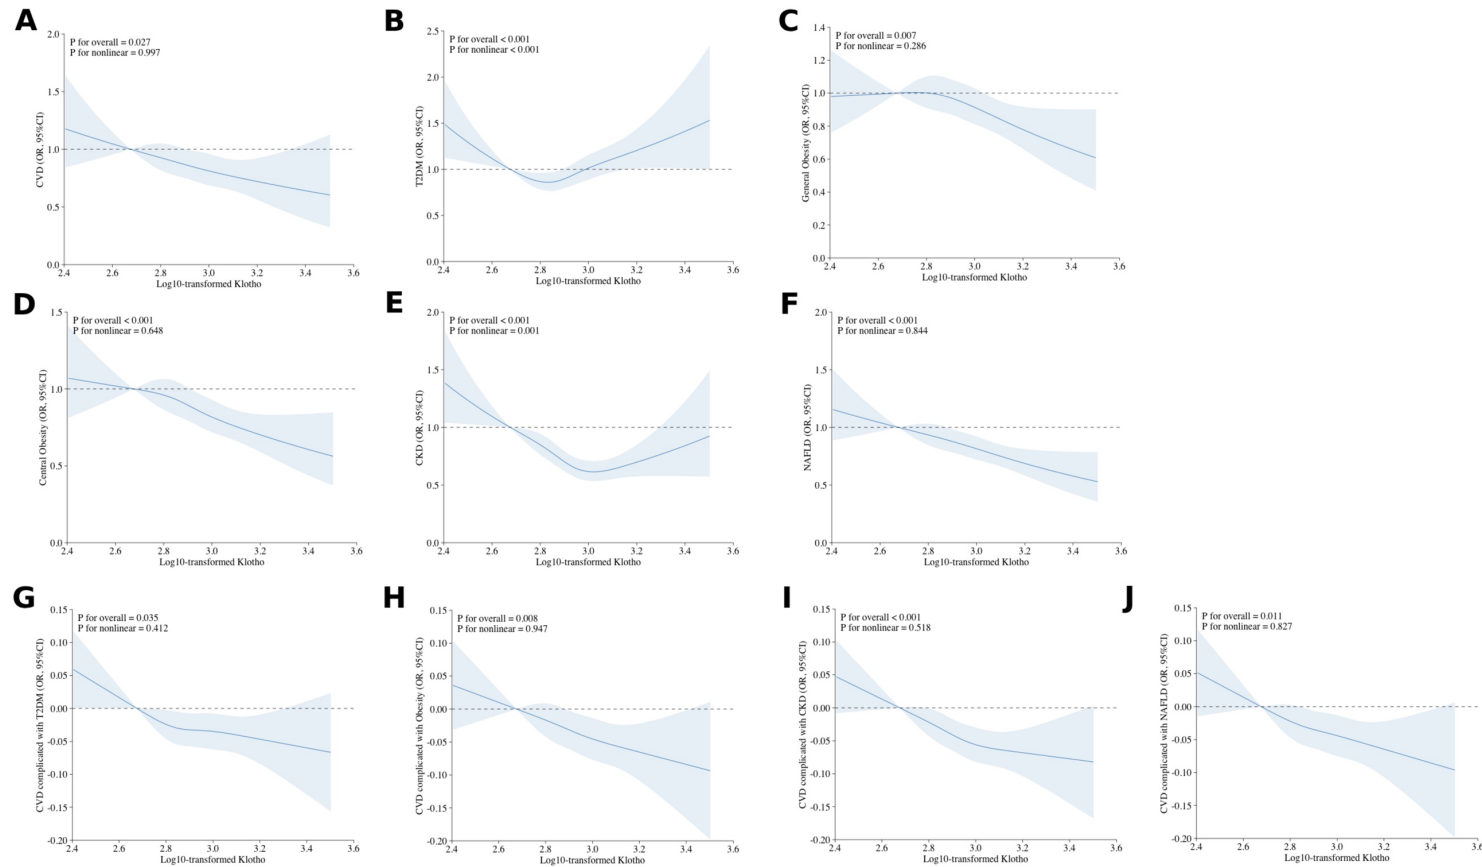

**Supplementary Figure 2. Restricted cubic spline curve for the dose–response relationship of  $\alpha$ -Klotho with odds ratio (OR) of cardiometabolic disease prevalence<sup>#</sup> (A) CVD; (B) T2DM; (C) General Obesity; (D) Central Obesity; (E) CKD; (F) NAFLD; (G) CVD complicated with T2DM; (H) CVD complicated with Obesity; (I) CVD complicated with CKD; (J) CVD complicated with NAFLD**

<sup>#</sup> Adjusted for all factors in full adjustment model. The k1 point was designated as reference point ( $\gamma=0$ )

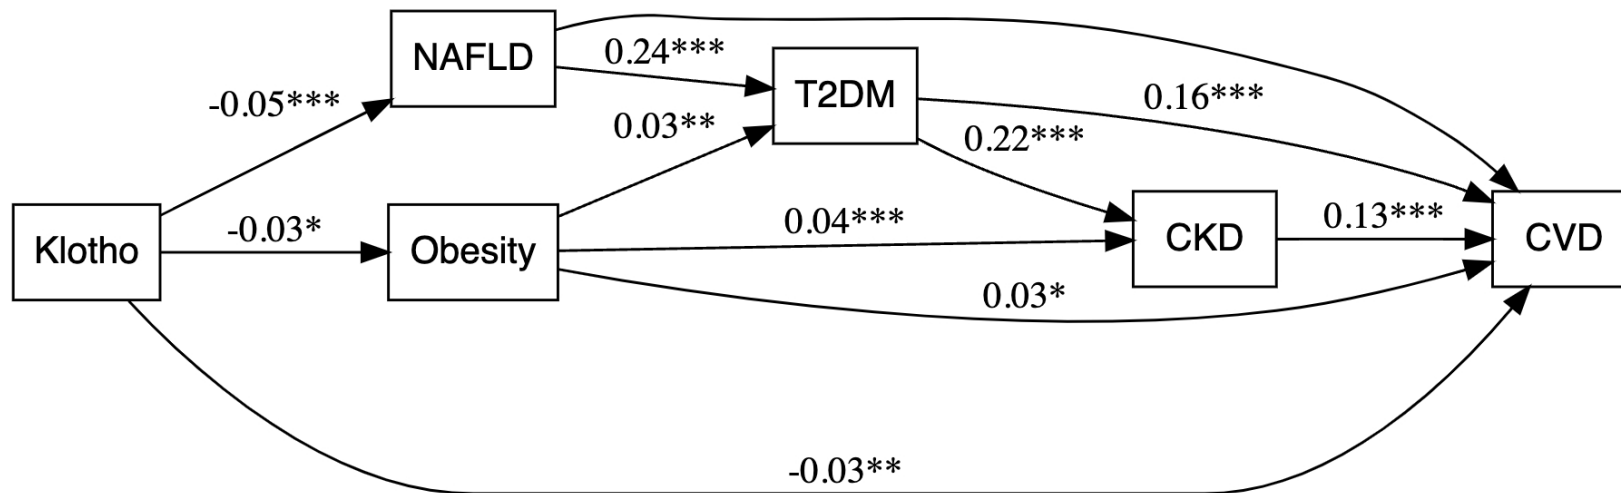

**Supplementary Figure 3. A multiple mediating model illustrating the association between  $\alpha$ -Klotho and CVD through T2DM, obesity, CKD, and NAFLD.**

*All path coefficients are standardized. Only statistically significant paths are labeled with their corresponding coefficients and P-values. Obesity refers to either central obesity or general obesity. Klotho refers to log10-transformed  $\alpha$ -Klotho level. Abbreviations: CVD, cardiovascular disease; T2DM, type 2 diabetes mellitus; CKD, chronic kidney disease; NAFLD, non-alcoholic fatty liver disease; DE, direct effect; IE, indirect effect; TE, total effect. Significance levels: \*  $P < 0.05$ ; \*\*  $P < 0.01$ ; \*\*\*  $P < 0.001$ .*

**Supplementary Table 1. The association between  $\alpha$ -Klotho (log10-transformed) and HbA1c, CRP, LDL and HDL using linear regression**

| Outcomes               | Model 1*             |         | Model 2*             |         | Model 3*             |         |
|------------------------|----------------------|---------|----------------------|---------|----------------------|---------|
|                        | $\beta$ (95%CI)      | P value | $\beta$ (95%CI)      | P value | $\beta$ (95%CI)      | P value |
| <b>HbA1c</b>           | 0.35 (0.16, 0.53)    | <0.001  | 0.42 (0.24, 0.60)    | <0.001  | 0.34 (0.16, 0.52)    | <0.001  |
| <b>CRP</b>             | -0.27 (-0.42, -0.12) | <0.001  | -0.32 (-0.47, -0.16) | <0.001  | -0.33 (-0.52, -0.14) | 0.004   |
| <b>LDL cholesterol</b> | -3.98(-14.06, 6.10)  | 0.434   | -5.67 (-15.79, 4.46) | 0.268   | -4.10 (-14.32, 6.15) | 0.427   |
| <b>HDL cholesterol</b> | 1.81 (-2.09, 5.71)   | 0.358   | -0.41 (-3.88, 3.05)  | 0.813   | 3.07(-0.05, 6.20)    | 0.054   |

\*Model 1: Univariate model

\*Model 2: Adjusted for age, sex, race/ethnicity, marital status, education level, and poverty income ratio (PIR)

\*Model 3: Additional adjustments included hypertension history, cancer history, alcohol consumption, smoking status, recreational VMPA, work VMPA, commuting VMPA, and sedentary behavior

Abbreviations: HbA1c, glycated hemoglobin; CRP, C-reactive protein; LDL, low-density lipoprotein cholesterol; HDL, high-density lipoprotein cholesterol; VMPA, vigorous and moderate physical activity.
